# Supplementary material for: Protective Effects of Moderate Ca Supplementation against Cd-Induced Bone Damage under Different Population-Relevant Doses in Young Female Rats
Source: PubMed Central journal article supplement (PMC6521033; doi:10.3390/nu11040849), 2019-04-15
Supplement: nutrients-11-00849-s001.pdf [file nutrients-11-00849-s001.pdf]

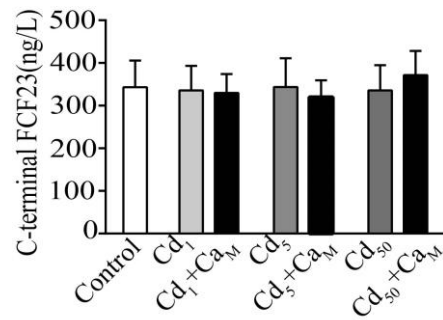

Figure S1: Serum C-terminal FCF23 in the study of moderate Ca supplementation exposure to different diet Cd.

Supplementary Table S1 Composition of AIN-93G diets (g/kg)

| Ingredient (g/kg)        |         |
|--------------------------|---------|
| Casein                   | 200     |
| Cornstarch               | 397.486 |
| Dextrin                  | 132     |
| Sucrose                  | 100     |
| Soybean oil              | 70      |
| Cellulose                | 50      |
| Mineral mix <sup>a</sup> | 35      |
| Vitamin mix <sup>b</sup> | 10      |
| L-Cystine                | 3       |
| Choline bitartrate       | 2.5     |
| Tert-Butylhydroquinone   | 0.014   |

a The composition of mineral mixture was based on AIN-93G. It provided (mg/kg diet): Ca, 5000; P,3000; Mg, 513; Fe, 45; Zn, 38 and Cu, 6.

b The composition of vitamin mixture was based on AIN-93. The diets contain 1 IU Vitamin D3 per 1g diet

Supplementary Table S2 Primer sequences for quantitative real-time polymerase chain reaction.

|             | Genes        | primers                  |
|-------------|--------------|--------------------------|
| NM_017008.4 | R-GAPDH-S    | CTGGAGAAACCTGCCAAGTATG   |
|             | R-GAPDH-A    | GGTGAAGAATGGGAGTTGCT     |
| NM_031336.1 | R-Klotho -S  | TCCGACGAGGACTCTTCTATGT   |
|             | R- Klotho -A | GGCTACAACCCCGTCTACTTTA   |
| NM_024146.1 | R- Fgfr1-S   | GGAGGCTACAAGGTTTCGTTACG  |
|             | R- Fgfr1-A   | AATGCTCCCATACTCGTTCTCC   |
| NM_053763.1 | R-Cyp27b1-S  | CGGGACACTTCGCACAGTTTAT   |
|             | R-Cyp27b1-A  | TTCTTCACCATCCGCCGTTAG    |
| NM_013030.1 | R-Napi2a-S   | TCACAGTCTCATTCGGATTTGGT  |
|             | R-Napi2a-A   | TGACGAGGAGGATAAGACAAGTGC |
| NM_201635.3 | R-Cyp24a1-S  | AATGAGGTCTTGGCTGACTTTCT  |

|                |                 |                               |
|----------------|-----------------|-------------------------------|
| NM_053304.1    | R-Cyp24a1-A     | TCACCATCATCTTCCCAAACG         |
|                | R-Colla1(RZ) -S | AGAGGCATAAAGGGTCATCGTG        |
|                | R-Colla1(RZ)-A  | AGACCGTTGAGTCCATCTTTGC        |
| NM_013004.1    | R-Phex-S        | CCAAACCACTGCTCCACATCTT        |
|                | R-Phex-A        | TATGCTCATTGGATGCCTTGTC        |
| NM_001278483.1 | R-Runx2(RZ)-S   | GCGGACGAGGCAAGAGTTTC          |
|                | R-Runx2(RZ)-A   | GACTTGGTGCTGAGTTCAGGGAG       |
| NM_053650.1    | R-ALP (RZ) -S   | GGATCAAAGCAGCATCTTACCAG       |
|                | R-ALP (RZ) -A   | GCTTTCCCATCTTCCGACACT         |
| NM_012881.2    | R-OPN(rz)-S     | GATGAACAGTATCCCGATGCCA        |
|                | R-OPN(rz)-A     | GTCTTCCCGTTGCTGTCCTGA         |
| NM_001037632   | R- Osterix-S    | CTGGGAAAAGGAGGCACAAAGA        |
|                | R- Osterix-A    | GGGGAAAGGGTGGGTAGTCATT        |
| NM_013414.1    | R- OCN (RZ) -S  | AGGGCAGTAAGGTGGTGAATAGA       |
|                | R- OCN (RZ) -A  | GAAGCCAATGTGGTCCGCTA          |
| NM_203493.3    | R-Dmp1(RZ)-S    | CGCCCATGGCAAATAGTGAC          |
|                | R- Dmp1 (RZ)-A  | CTCCTTATCGGCGTCCATCC          |
| NM_130754.1    | R-FGF23(RZ)-S   | AGAGCCTATTCAGACACTTCCCC       |
|                | R-FGF23(RZ)-A   | AGCCAGCATCCTCTGATGTGAT        |
| NM_030584.1    | R-Sost(RZ)-S    | CAACCAGACCATGAACCGGG          |
|                | R-Sost(RZ)-A    | TCACGAAGCGGGTGTAGTG           |
| NM_001106350.1 | R-Dkk1-S        | GTGTTCTGGTGGACAGTTTGCC        |
|                | R-Dkk1-A        | TCTCAATCTCGTCTGGGCTGAT        |
| NM_012870.2    | R-OPG-S         | GTGTTCTGGTGGACAGTTTGCC        |
|                | R-OPG-A         | TCTCAATCTCGTCTGGGCTGAT        |
| NM_057149.1    | R- RANKL -S     | CATCGGGTTCCATAAAGTCAGT        |
|                | R- RANKL -A     | GCAAATGTTGGCGTACAGGTAAT       |
| NM_012669.1    | R-Tcf1-S        | CAGCGGAGGTCCCTTAGTCA          |
|                | R-Tcf1-A        | CAGACCAATGACCAGGGTAGAG        |
| NM_024355.1    | R-Axin2(RZ)-S   | ATGTCCATGACAGACAGTAGCGTA<br>G |
|                | R-Axin2(RZ)-A   | TGGGTTCTCGGGAAGTGAGG          |
| NM_001105714.1 | R-Wnt1(rz)-S    | TGGGTTTCTGCTACGTTGCTACT       |
|                | R-Wnt1(rz)-A    | CAGCCTCGGTTGACGATCTT          |
| NM_053357.2    | R-β-catenin-S   | TGGTGAAAATGCTTGGGTGC          |
|                | R-β-catenin-A   | TCTGAAGGCAGTCTGTCGTAATAG      |

---

**Supplementary Table S3 Summary of food consumption data (g/week) in the  
90-day oral toxicity study (mean ± SD, n =10).**

|                     | <b>Control</b>   | <b>Cd<sub>I</sub></b> | <b>Cd<sub>I</sub>+ Ca<sub>L</sub></b> | <b>Cd<sub>I</sub>+Ca<sub>M</sub></b> | <b>Cd<sub>I</sub>+Ca<sub>H</sub></b> |
|---------------------|------------------|-----------------------|---------------------------------------|--------------------------------------|--------------------------------------|
| Week1(da<br>y1-7)   | 111.34±8<br>.67  | 118.41±2<br>.03       | 104.44±1<br>.48                       | 111.62±3<br>.5                       | 119.88±<br>3.14                      |
| Week2(da<br>y8-14)  | 111.24±2<br>3.59 | 128.02±1<br>9.35      | 109.62±2<br>9.29                      | 114.3±15<br>.94                      | 133.06±<br>16.29                     |
| Week3(da<br>y15-21) | 135.98±7<br>.17  | 144.61±1<br>4.52      | 110.58±7<br>.95*                      | 129.37±9<br>.09                      | 148.2±1<br>4.62                      |
| Week4(da<br>y22-28) | 136.64±0<br>.3   | 139.86±7<br>.82       | 127.89±1<br>.84*                      | 124.21±6<br>.53                      | 141.02±<br>9.85                      |
| Week5(da<br>y29-35) | 124.81±2<br>.8   | 136.26±1<br>2.14      | 118.76±0<br>.85*                      | 117.67±7<br>.53                      | 132.44±<br>3.17                      |
| Week6(da<br>y36-42) | 120.54±3<br>.25  | 141.93±9<br>.48*      | 121.38±2<br>.8                        | 123.62±8<br>.19                      | 132.41±<br>9.41*                     |
| Week7(da<br>y43-49) | 123.79±1<br>0.04 | 138.11±2<br>2.81      | 116.52±1<br>5.05                      | 120.06±1<br>3.51                     | 120.77±<br>17.83                     |
| Week8(da<br>y50-56) | 123.93±1<br>0.88 | 141.4±15<br>.05       | 123.48±5<br>.53                       | 126.95±6<br>.6                       | 131.39±<br>1.25                      |
| Week9(da<br>y57-63) | 134.82±1<br>4.46 | 137.94±9<br>.04       | 123.3±0.<br>18                        | 126.42±4<br>.43                      | 130.9±1<br>.03                       |
| Week10(d            | 126.95±4         | 134.51±2              | 123.09±5                              | 125.9±2.                             | 130.38±                              |

|          |          |          |          |          |         |
|----------|----------|----------|----------|----------|---------|
| ay64-70) | .76      | .99      | .94*     | 25       | 3.36    |
| Week11(d | 129.47±2 | 122.03±1 | 120.38±2 | 127.55±2 | 129.64± |
| ay71-77) | 4.15     | 8.6      | 2.41     | 3.95     | 23.85   |
| Week12(d | 113.12±2 | 102±0.59 | 133.39±8 | 123.03±2 | 124.66± |
| ay78-84) | 0.22     |          | .45      | 3.8      | 19.74   |
| Week13(d | 101.75±1 | 99.6±0.5 | 107.63±7 | 108.48±2 | 107.59± |
| ay85-90) | 7.8      | 1        | .49      | 1        | 17.42   |

\* Statistically significant from control, p<0.05.

**Supplementary Table S4 Absolute organ weight and relative organ weight in the 90-day oral toxicity study (mean ± SD, n = 10).**

|                              | Control | Cd <sub>1</sub> | Cd <sub>1+</sub> | Cd <sub>1+</sub> | Cd <sub>1+</sub> |
|------------------------------|---------|-----------------|------------------|------------------|------------------|
|                              |         |                 | Ca <sub>L</sub>  | Ca <sub>M</sub>  | Ca <sub>H</sub>  |
| Body weight <sup>a</sup> (g) | 308±52  | 338±59          | 310±28           | 299±27           | 315±30           |
| Heart(g)                     | 1.01±0. | 0.98±0.         | 0.96±0.          | 0.92±0.          | 0.97±0.          |
|                              | 1       | 2               | 19               | 18               | 23               |
| Liver                        | 8.77±1. | 9.18±2.         | 8.11±0.          | 7.96±0.          | 7.89±0.          |
|                              | 24      | 25              | 77               | 79               | 73               |
| Spleen                       | 0.5±0.1 | 0.53±0.         | 0.54±0.          | 0.51±0.          | 0.48±0.          |
|                              | 2       | 09              | 13               | 14               | 1                |
| Kidney(paired)               | 2.14±0. | 2.05±0.         | 1.88±0.          | 1.88±0.          | 2.03±0.          |
|                              | 4       | 42              | 23               | 15               | 28               |

|                                     |         |         |         |         |         |
|-------------------------------------|---------|---------|---------|---------|---------|
| Uterus                              | 0.55±0. | 0.55±0. | 0.57±0. | 0.64±0. | 0.63±0. |
|                                     | 24      | 16      | 29      | 39      | 17      |
| Ovary(paired)                       | 0.13±0. | 0.2±0.1 | 0.13±0. | 0.14±0. | 0.13±0. |
|                                     | 05      | 9       | 02      | 02      | 02      |
| Heart/body weight ratios(mg/100 g)  | 0.33±0. | 0.3±0.0 | 0.31±0. | 0.31±0. | 0.31±0. |
|                                     | 05      | 6       | 04      | 04      | 06      |
| Liver/body weight ratios(mg/100 g)  | 2.88±0. | 2.74±0. | 2.62±0. | 2.65±0. | 2.51±0. |
|                                     | 46      | 4       | 22      | 06      | 25      |
| Spleen/body weight ratios(mg/100 g) | 0.16±0. | 0.16±0. | 0.17±0. | 0.17±0. | 0.15±0. |
|                                     | 03      | 03      | 04      | 05      | 03      |
| Kidney/body weight ratios(mg/100 g) | 0.7±0.1 | 0.61±0. | 0.6±0.0 | 0.63±0. | 0.64±0. |
|                                     | 2       | 08      | 5       | 06      | 09      |
| Uterus/body weight ratios(mg/100 g) | 0.19±0. | 0.17±0. | 0.18±0. | 0.21±0. | 0.2±0.0 |
|                                     | 1       | 07      | 08      | 11      | 5       |
| Ovary/body weight ratios(mg/100 g)  | 0.04±0. | 0.06±0. | 0.04±0. | 0.05±0. | 0.04±0. |
|                                     | 02      | 07      | 01      | 01      | 01      |

<sup>a</sup>Terminal body weight.

**Supplementary Table S5 Summary of histopathology in kidney in the 90-day oral toxicity study (n = 10).**

|                     | Severity | Control | Cd <sub>1</sub> | Cd <sub>1</sub> + Ca <sub>L</sub> | Cd <sub>1</sub> + Ca <sub>M</sub> | Cd <sub>1</sub> + Ca <sub>H</sub> |
|---------------------|----------|---------|-----------------|-----------------------------------|-----------------------------------|-----------------------------------|
| Tubular vacuolation | ±        | 10      | 10              | 9                                 | 7                                 | 7                                 |
|                     | +        | 0       | 0               | 1                                 | 3                                 | 3                                 |

|                                      |    |   |   |   |   |    |
|--------------------------------------|----|---|---|---|---|----|
| Protein cast                         | ±  | 7 | 7 | 4 | 3 | 0  |
|                                      | +  | 3 | 3 | 6 | 7 | 10 |
| Calcification                        | ±  | 2 | 2 | 0 | 0 | 0  |
|                                      | +  | 8 | 6 | 9 | 5 | 4  |
|                                      | 2+ | 0 | 2 | 1 | 3 | 4  |
|                                      | 3+ | 0 | 0 | 0 | 2 | 2  |
| Interstitial lymphocytic infiltrates | 0  | 0 | 0 | 0 | 2 | 0  |

Severity scale: ±, Minimal; +, Slight; 2+, Moderate; 3+, Marked

**Supplementary Table S6 Left femur dry weight in experiment 2 (g, n = 10).**

| Control   | Cd <sub>1</sub> | Cd <sub>1</sub> + Ca <sub>M</sub> | Cd <sub>5</sub> | Cd <sub>5</sub> + Ca <sub>M</sub> | Cd <sub>50</sub> | Cd <sub>50</sub> + Ca <sub>M</sub> |
|-----------|-----------------|-----------------------------------|-----------------|-----------------------------------|------------------|------------------------------------|
| 0.63±0.06 | 0.69±0.07       | 0.66±0.04                         | 0.66±0.07       | 0.68±0.08                         | 0.62±0.04        | 0.62±0.07                          |
